# Supplementary material for: Amoxicillin resistance in uropathogenic Escherichia coli: extracellular proteomic Insights into transporter and multidrug resistance transporter proteins
Source: Research Square preprint supplement (doi:10.21203/rs.3.rs-7634107/v1), 2025-09-18
Supplement: Supplementary file 1 [file 6ac97536db11c8c54c7ac5f0.docx]

| **Supplementary Table 1: Gene ontology analysis of exclusively expressed extracellular proteins from developed AMX- resistant UPEC strain along with the basic LC-MS/MS identification parameters** | | | | | | | | | | |
| --- | --- | --- | --- | --- | --- | --- | --- | --- | --- | --- |
| **S.no** | **Mapped IDs** | **Gene Name, Gene Symbol** | **# AAs** | **MW [kDa]** | **Calc. pI** | **Coverage [%]** | **# Peptides** | **PANTHER Family/Subfamily** | **Panther Protein class** | **Species** |
| 1 | P77265 | Multidrug resistance-like ATP-binding protein MdlA, mdlA | 590 | 66 | 6.54 | 3 | 1 | MULTIDRUG RESISTANCE-LIKE ATP-BINDING PROTEIN MDLA (PTHR24221:SF300) | ATP-binding cassette (ABC) transporter | *E.coli* |
| 2 | P33915 | Inner membrane ABC transporter permease protein YejE, yejE | 341 | 38.1 | 9.42 | 5 | 1 | INNER MEMBRANE ABC TRANSPORTER PERMEASE PROTEIN YEJE (PTHR30325:SF0) | ATP-binding cassette (ABC) transporter | *E.coli* |
| 3 | P22731 | High-affinity branched-chain amino acid transport ATP-binding protein LivF, livF | 237 | 26.3 | 5.87 | 10 | 1 | HIGH-AFFINITY BRANCHED-CHAIN AMINO ACID TRANSPORT ATP-BINDING PROTEIN LIVF (PTHR43820:SF4) | ATP-binding cassette (ABC) transporter | *E.coli* |
| 4 | P37902 | Glutamate_aspartate import solute-binding protein, gltI | 302 | 33.4 | 8.53 | 32 | 5 | GLUTAMATE_ASPARTATE IMPORT SOLUTE-BINDING PROTEIN (PTHR30085:SF2) | ATP-binding cassette (ABC) transporter | *E.coli* |
| 5 | P77795 | Uncharacterized ABC transporter ATP-binding protein YdcT, ydcT | 337 | 37 | 7.05 | 2 | 1 | SPERMIDINE_PUTRESCINE IMPORT ATP-BINDING PROTEIN POTA (PTHR42781:SF4) | ATP-binding cassette (ABC) transporter | *E.coli* |
| 6 | P32721 | D-allose import ATP-binding protein AlsA, alsA | 510 | 56.7 | 7.42 | 4 | 1 | D-ALLOSE IMPORT ATP-BINDING PROTEIN ALSA-RELATED (PTHR43790:SF3) | ATP-binding cassette (ABC) transporter | *E.coli* |
| 7 | P76128 | Probable D,D-dipeptide-binding periplasmic protein DdpA, ddpA | 516 | 57.6 | 6.74 | 7 | 2 | D,D-DIPEPTIDE-BINDING PERIPLASMIC PROTEIN DDPA-RELATED (PTHR30290:SF38) | ATP-binding cassette (ABC) transporter | *E.coli* |
| 8 | P04816 | Leucine-specific-binding protein, livK | 369 | 39.4 | 5.77 | 14 | 2 | LEUCINE-SPECIFIC-BINDING PROTEIN (PTHR47151:SF3) | ATP-binding cassette (ABC) transporter | *E.coli* |
| 9 | P33913 | Uncharacterized protein YejA, yejA | 604 | 69.6 | 8.7 | 10 | 3 | ABC TRANSPORTER PERIPLASMIC BINDING PROTEIN (PTHR30290:SF64) | ATP-binding cassette (ABC) transporter | *E.coli* |
| 10 | P33916 | Uncharacterized ABC transporter ATP-binding protein YejF, yejF | 529 | 58.7 | 9.01 | 4 | 1 | NICKEL IMPORT ATP-BINDING PROTEIN NIKD (PTHR24220:SF607) | ATP-binding cassette (ABC) transporter | *E.coli* |
| 11 | Q46863 | Probable deoxycholate-binding periplasmic protein YgiS, ygiS | 535 | 60.7 | 6.81 | 3 | 1 | PERIPLASMIC OLIGOPEPTIDE-BINDING PROTEIN-RELATED (PTHR30290:SF10) | ATP-binding cassette (ABC) transporter | *E.coli* |
| 12 | P33360 | Glycine betaine uptake system ATP-binding protein YehX, yehX | 308 | 34.4 | 6.29 | 5 | 1 | GLYCINE BETAINE UPTAKE SYSTEM ATP-BINDING PROTEIN YEHX (PTHR43117:SF5) | ATP-binding cassette (ABC) transporter | *E.coli* |
| 13 | P77499 | Probable ATP-dependent transporter SufC, sufC | 248 | 27.6 | 4.98 | 5 | 1 | ABC TRANSPORTER I FAMILY MEMBER 6, CHLOROPLASTIC (PTHR43204:SF1) | ATP-binding cassette (ABC) transporter | *E.coli* |
| 14 | P16678 | Putative phosphonates utilization ATP-binding protein PhnK, phnK | 252 | 27.8 | 6.81 | 6 | 1 | PHOSPHONATES UTILIZATION ATP-BINDING PROTEIN PHNK-RELATED (PTHR42764:SF1) | ATP-binding cassette (ABC) transporter | *E.coli* |
| 15 | P0AAG3 | Glutamate_aspartate import ATP-binding protein GltL, gltL | 241 | 26.6 | 7.11 | 5 | 1 | GLUTAMATE_ASPARTATE IMPORT ATP-BINDING PROTEIN GLTL (PTHR43166:SF9) | ATP-binding cassette (ABC) transporter | *E.coli* |
| 16 | P77257 | Autoinducer 2 import ATP-binding protein LsrA, lsrA | 511 | 55.8 | 7.28 | 4 | 2 | AUTOINDUCER 2 IMPORT ATP-BINDING PROTEIN LSRA (PTHR43790:SF2) | ATP-binding cassette (ABC) transporter | *E.coli* |
| 17 | P33590 | Nickel-binding periplasmic protein, nikA | 524 | 58.7 | 6.1 | 2 | 1 | NICKEL-BINDING PERIPLASMIC PROTEIN (PTHR30290:SF37) | ATP-binding cassette (ABC) transporter | *E.coli* |
| 18 | P76027 | Oligopeptide transport ATP-binding protein OppD, oppD | 337 | 37.2 | 6.1 | 7 | 1 | D,D-DIPEPTIDE TRANSPORT ATP-BINDING PROTEIN DDPD-RELATED (PTHR43297:SF7) | ATP-binding cassette (ABC) transporter | *E.coli* |
| 19 | P10906 | sn-glycerol-3-phosphate transport system permease protein UgpE, ugpE | 281 | 31.5 | 6.32 | 8 | 1 | SN-GLYCEROL-3-PHOSPHATE TRANSPORT SYSTEM PERMEASE PROTEIN UGPE (PTHR43744:SF8) | ATP-binding cassette (ABC) transporter | *E.coli* |
| 20 | P37313 | Dipeptide transport ATP-binding protein DppF, dppF | 334 | 37.5 | 8.85 | 7 | 1 | DIPEPTIDE TRANSPORT ATP-BINDING PROTEIN DPPF (PTHR43776:SF6) | ATP-binding cassette (ABC) transporter | *E.coli* |
| 21 | P77279 | Probable iron export ATP-binding protein FetA, fetA | 225 | 25.4 | 5.43 | 9 | 1 | IRON EXPORT ATP-BINDING PROTEIN FETA-RELATED (PTHR43423:SF12) | ATP-binding cassette (ABC) transporter | *E.coli* |
| 22 | P45759 | Putative type II secretion system protein E, gspE | 493 | 54.6 | 6.3 | 4 | 1 | BACTERIOPHAGE ADSORPTION PROTEIN B-RELATED (PTHR30258:SF27) | Transporter | *E.coli* |
| 23 | P37758 | Nitrate_nitrite transporter NarU, narU | 462 | 49.9 | 9.99 | 2 | 1 | NITRATE_NITRITE TRANSPORTER NARU (PTHR23515:SF6) | Transporter | *E.coli* |
| 24 | P27303 | Multidrug export protein EmrA, emrA | 390 | 42.7 | 9.33 | 6 | 2 | MULTIDRUG EXPORT PROTEIN EMRA-RELATED (PTHR30386:SF19) | Transporter | *E.coli* |
| 25 | P28303 | DNA damage-inducible protein F, dinF | 459 | 49.6 | 9.72 | 3 | 1 | PROTEIN DETOXIFICATION 44, CHLOROPLASTIC (PTHR42893:SF46) | Transporter | *E.coli* |
| 26 | P31436 | Sugar efflux transporter C, setC | 394 | 43.5 | 8.28 | 6 | 1 | SUGAR EFFLUX TRANSPORTER A-RELATED (PTHR23535:SF2) | Transporter | *E.coli* |
| 27 | P52599 | Probable multidrug resistance protein EmrK, emrK | 387 | 42.6 | 7.62 | 11 | 2 | MULTIDRUG EXPORT PROTEIN EMRA-RELATED (PTHR30386:SF19) | Transporter | *E.coli* |
| 28 | P0AC26 | Nitrite transporter NirC, nirC | 268 | 28.5 | 8.47 | 3 | 1 | NITRITE TRANSPORTER NIRC (PTHR30520:SF8) | Transporter | *E.coli* |
| 29 | Q46817 | Guanine_hypoxanthine permease GhxQ, ghxQ | 455 | 46.7 | 7.71 | 5 | 1 | GUANINE_HYPOXANTHINE PERMEASE GHXQ (PTHR43337:SF4) | Transporter | *E.coli* |
| 30 | P0AFR2 | C4-dicarboxylic acid transporter DauA, dauA | 559 | 59.4 | 8.81 | 6 | 2 | C4-DICARBOXYLIC ACID TRANSPORTER DAUA (PTHR11814:SF215) | Transporter | *E.coli* |
| 31 | P77389 | Inner membrane transport protein YdhP, ydhP | 389 | 40 | 10.2 | 3 | 1 | INNER MEMBRANE TRANSPORT PROTEIN YDHP (PTHR43124:SF8) | Transporter | *E.coli* |
| 32 | P0AAD6 | Serine transporter SdaC, sdaC | 429 | 46.9 | 9.16 | 3 | 1 | SERINE TRANSPORTER SDAC (PTHR35334:SF2) | Transporter | *E.coli* |
| 33 | P37683 | Inner membrane protein YiaV, yiaV | 378 | 41.7 | 9.09 | 8 | 2 | INNER MEMBRANE PROTEIN YIAV-RELATED (PTHR30386:SF18) | Transporter | *E.coli* |
| 34 | P77228 | Putative transporter YdfJ, ydfJ | 427 | 46.2 | 9.1 | 11 | 2 | TRANSPORTER YDFJ-RELATED (PTHR43045:SF4) | Transporter | *E.coli* |
| 35 | P33349 | Uncharacterized protein YehM, yehM | 759 | 83.3 | 5.94 | 2 | 1 | VWA DOMAIN-CONTAINING PROTEIN (PTHR30634:SF7) | Transporter | *E.coli* |
| 36 | P0ABP3 | Anaerobic C4-dicarboxylate transporter DcuC, dcuC | 461 | 48.4 | 8.13 | 6 | 1 | ANAEROBIC C4-DICARBOXYLATE TRANSPORTER DCUC-RELATED (PTHR42002:SF2) | Transporter | *E.coli* |
| 37 | Q47153 | Putative truncated flagellar export_assembly protein LfhA, lfhA | 579 | 63.1 | 6.11 | 11 | 3 | FLAGELLAR BIOSYNTHESIS PROTEIN FLHA-RELATED (PTHR30161:SF1) | Transporter | *E.coli* |
| 38 | P24180 | Multidrug export protein AcrE, acrE | 385 | 41.3 | 6.34 | 3 | 1 | MULTIDRUG EXPORT PROTEIN ACRE (PTHR30158:SF21) | Transporter | *E.coli* |
| 39 | P11551 | L-fucose-proton symporter. fucP | 438 | 47.5 | 8.7 | 7 | 2 | L-FUCOSE-PROTON SYMPORTER (PTHR43702:SF11) | Primary active transporter | *E.coli* |
| 40 | P21345 | Proton_glutamate-aspartate symporter. gltP | 437 | 47.1 | 8.47 | 4 | 1 | PROTON_GLUTAMATE-ASPARTATE SYMPORTER (PTHR42865:SF7) | Primary active transporter | *E.coli* |
| 41 | P02921 | Melibiose permease, melB | 473 | 52.6 | 8.51 | 7 | 2 | MELIBIOSE PERMEASE (PTHR11328:SF36) | Primary active transporter | *E.coli* |
| 42 | P0AER8 | Sodium_glutamate symporter, gltS | 401 | 42.4 | 8.43 | 8 | 1 | SODIUM_GLUTAMATE SYMPORTER (PTHR36178:SF1) | Primary active transporter | *E.coli* |
| 43 | P75683 | Putative glycoside_cation symporter YagG, yagG | 460 | 50.6 | 8.41 | 9 | 3 | MAJOR FACILITATOR SUPERFAMILY (MFS) PROFILE DOMAIN-CONTAINING PROTEIN (PTHR11328:SF24) | Primary active transporter | *E.coli* |
| 44 | P0AA76 | D-galactonate transporter, dgoT | 430 | 47 | 9.36 | 3 | 1 | D-GALACTONATE TRANSPORTER (PTHR11662:SF333) | Secondary carrier transporter | *E.coli* |
| 45 | P31474 | Probable transport protein HsrA, hsrA | 475 | 51.4 | 10.39 | 5 | 2 | TRANSPORT PROTEIN HSRA-RELATED (PTHR23501:SF1) | Secondary carrier transporter | *E.coli* |
| 46 | P39836 | Putative symporter YfeH, yfeH | 332 | 36.4 | 9.44 | 5 | 1 | SODIUM_BILE ACID COTRANSPORTER 7 (PTHR18640:SF5) | Secondary carrier transporter | *E.coli* |
| 47 | P24241 | PTS system arbutin-, cellobiose-, and salicin-specific EIIBC component, ascF | 485 | 51 | 8.78 | 6 | 2 | PTS SYSTEM ARBUTIN-, CELLOBIOSE-, AND SALICIN-SPECIFIC EIIBC COMPONENT-RELATED (PTHR30175:SF1) | Secondary carrier transporter | *E.coli* |
| 48 | P39830 | Putative cation_proton antiporter YbaL, ybaL | 558 | 59.4 | 5.07 | 4 | 1 | CATION_PROTON ANTIPORTER YBAL-RELATED (PTHR42751:SF1) | Secondary carrier transporter | *E.coli* |
| 49 | Q46916 | Probable galactarate_D-glucarate transporter GudP, gudP | 450 | 49.1 | 9.41 | 5 | 2 | FI19708P1-RELATED (PTHR11662:SF399) | Secondary carrier transporter | *E.coli* |
| 50 | P39398 | Probable L-galactonate transporter, lgoT | 453 | 49.4 | 9.16 | 5 | 1 | FI19708P1-RELATED (PTHR11662:SF399) | Secondary carrier transporter | *E.coli* |
| 51 | P08722 | PTS system beta-glucoside-specific EIIBCA component, bglF | 625 | 66.4 | 6.1 | 2 | 1 | PTS SYSTEM ARBUTIN-, CELLOBIOSE-, AND SALICIN-SPECIFIC EIIBC COMPONENT-RELATED (PTHR30175:SF1) | Secondary carrier transporter | *E.coli* |
| 52 | P25527 | Gamma-aminobutyric acid permease, gabP | 466 | 51 | 9.5 | 4 | 1 | GAMMA-AMINOBUTYRIC ACID PERMEASE (PTHR43495:SF5) | Amino acid transporter | *E.coli* |
| 53 | P0AER5 | Glutamate_aspartate import permease protein GltK, gltK | 224 | 24.9 | 9.44 | 12 | 1 | GLUTAMATE_ASPARTATE IMPORT PERMEASE PROTEIN GLTK (PTHR30614:SF1) | Amino acid transporter | *E.coli* |
| 54 | P77610 | L-asparagine permease, ansP | 499 | 54.2 | 8.73 | 4 | 2 | L-ASPARAGINE PERMEASE (PTHR43495:SF1) | Amino acid transporter | *E.coli* |
| 55 | P39282 | Inner membrane transporter YjeM, yjeM | 500 | 54.7 | 9.01 | 2 | 1 | CATIONIC AMINO ACID TRANSPORTER 4 (PTHR43243:SF4) | Amino acid transporter | *E.coli* |
| 56 | P24207 | Phenylalanine-specific permease, pheP | 458 | 50.6 | 9.47 | 2 | 1 | PHENYLALANINE-SPECIFIC PERMEASE (PTHR43495:SF3) | Amino acid transporter | *E.coli* |
| 57 | P0C0S1 | Small-conductance mechanosensitive channel, mscS | 286 | 30.9 | 8.34 | 16 | 2 | SMALL-CONDUCTANCE MECHANOSENSITIVE CHANNEL (PTHR30221:SF1) | Ion channel | *E.coli* |
